# Supplementary material for: Mass-Specific Metabolic Rate Influences Sperm Performance through Energy Production in Mammals
Source: PubMed Central journal article supplement (PMC4570794; doi:10.1371/journal.pone.0138185), 2015-09-15

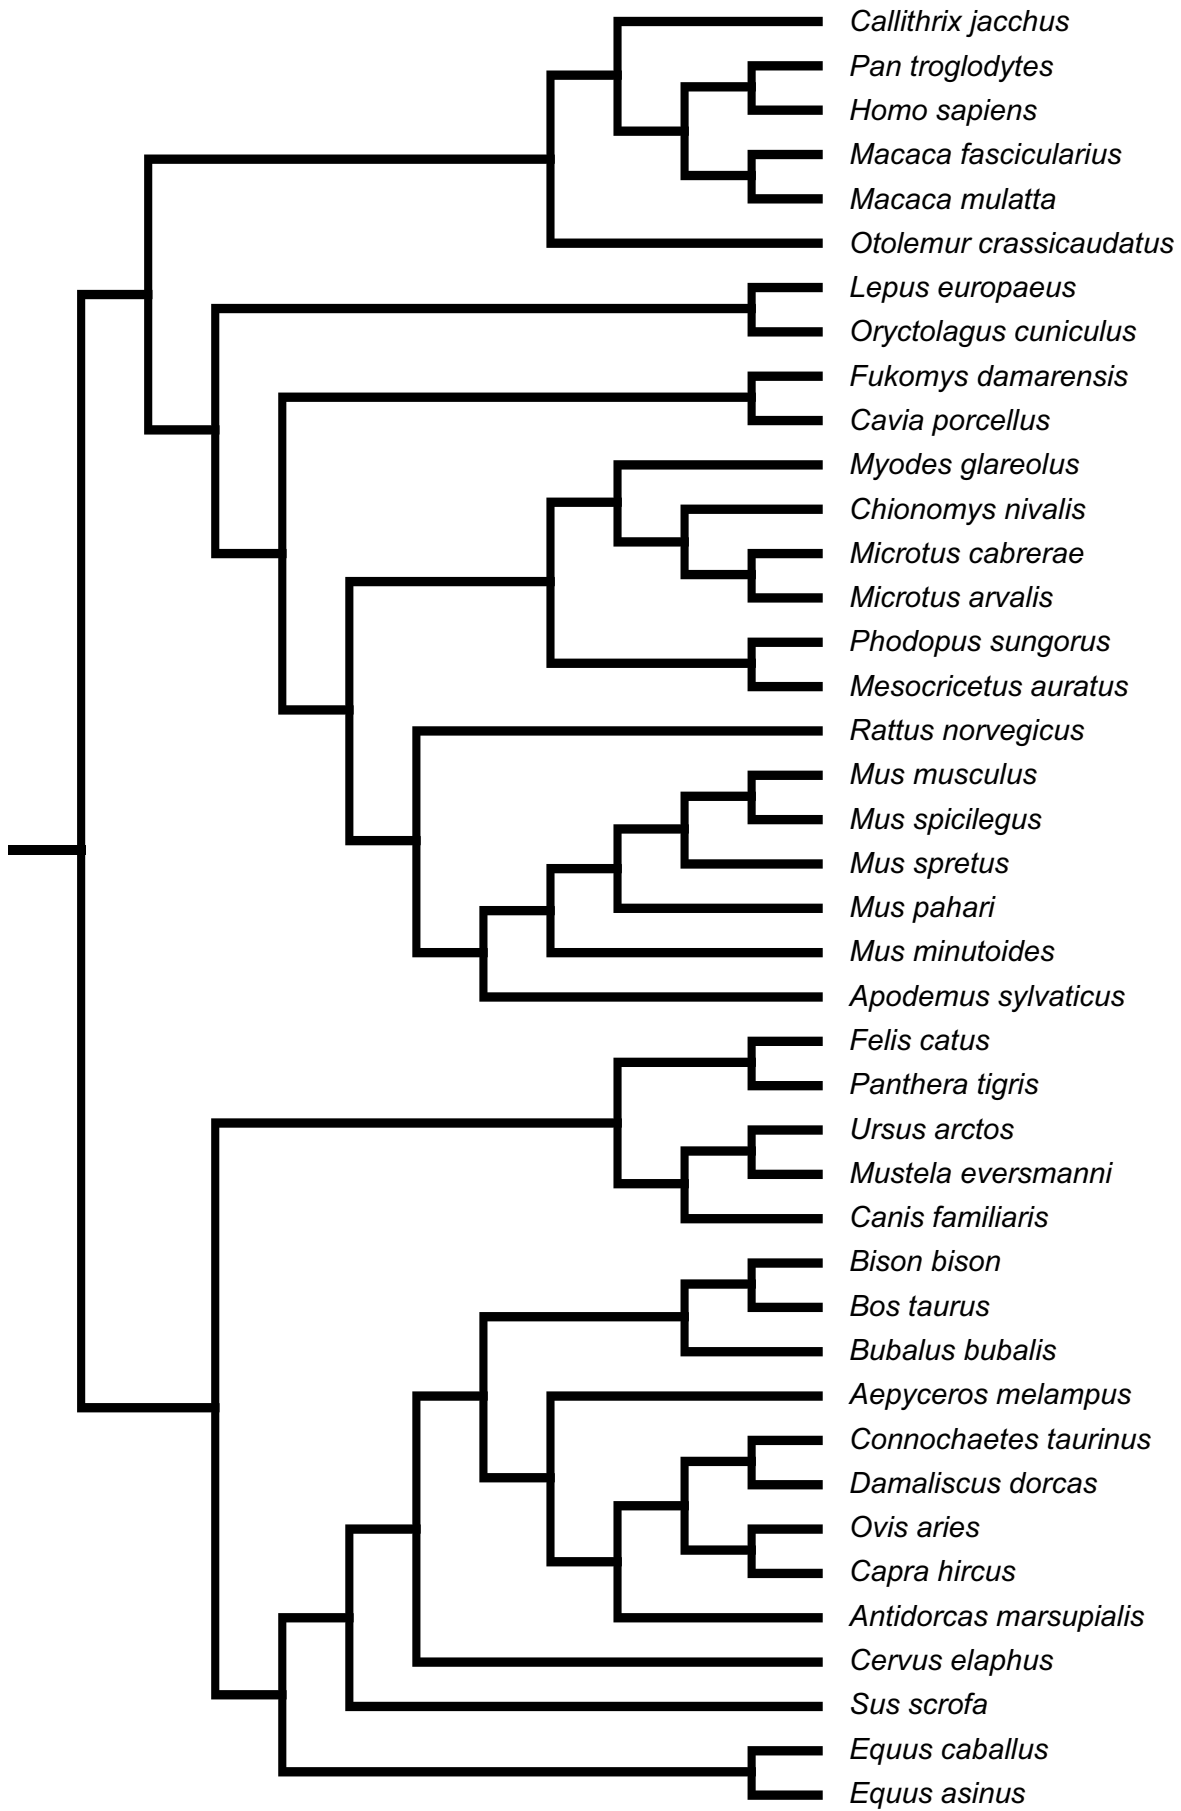

Supplement: pone.0138185.s002.pdf [file pone.0138185.s002.pdf]
