# Supplementary material for: Mass-Specific Metabolic Rate Influences Sperm Performance through Energy Production in Mammals
Source: PubMed Central journal article supplement (PMC4570794; doi:10.1371/journal.pone.0138185), 2015-09-15
Supplement: pone.0138185.s004.pdf [file pone.0138185.s004.pdf]

**S2 Table. Relations among mass-specific metabolic rate, ATP amount, and relative testes size in eutherian mammals.**

| Dependent variable                | Independent variable | Slope   | $R^2$ | $p$ -value        | $t$ -value | $\lambda$ value        | Effect size | CL(-)          | CL(+)          | n  |
|-----------------------------------|----------------------|---------|-------|-------------------|------------|------------------------|-------------|----------------|----------------|----|
| Mass-specific metabolic rate      | Body mass            | -0.3201 | 0.93  | <b>&lt;0.0001</b> | -8.8406    | <0.001 <sup>ns,*</sup> | -0.8462     | <b>-1.5945</b> | <b>-0.8905</b> | 34 |
|                                   | Testes mass          | 0.0744  |       | 0.1416            | 1.5082     |                        | 0.2615      | -0.0844        | 0.6197         |    |
| ATP amount per sperm              | Body mass            | -0.2928 | 0.43  | <b>0.0495</b>     | -2.0984    | 0.025 <sup>ns,*</sup>  | -0.4338     | <b>-0.9142</b> | <b>-0.0149</b> | 22 |
|                                   | Testes mass          | 0.2538  |       | 0.1928            | 1.3503     |                        | 0.2959      | -0.1446        | 0.7547         |    |
| Length-adjusted ATP concentration | Body mass            | -0.1396 | 0.18  | 0.1600            | -1.4624    | <0.001 <sup>ns,*</sup> | -0.3181     | -0.7792        | 0.1202         | 22 |
|                                   | Testes mass          | 0.1424  |       | 0.2821            | 1.1069     |                        | 0.2461      | -0.1984        | 0.7009         |    |

Phylogenetically controlled multiple regression analyses (PGLS). Superscripts following the  $\lambda$  value indicate significance levels (n.s.  $p > 0.05$ ; \* $p < 0.05$ ) in likelihood ratio tests against models with  $\lambda = 0$  (first position) and  $\lambda = 1$  (second position). Effect size  $r$  calculated from the  $t$  values and the non-central 95% confidence limits (CLs) for the  $z$ -transformed value of  $r$  are presented. Confidence intervals excluding 0 indicate statistically significant relationships.  $P$ -values and CL that indicate statistical significance are shown in bold. All variables were  $\log_{10}$  transformed. n: number of species.
